# Supplementary material for: A Multistage Formulation Based on Full-Length CSP and AMA-1 Ectodomain of Plasmodium vivax Induces High Antibody Titers and T-cells and Partially Protects Mice Challenged with a Transgenic Plasmodium berghei Parasite
Source: PubMed Central journal article supplement (PMC7356588; doi:10.3390/microorganisms8060916), 2020-06-17
Supplement: microorganisms-08-00916-s001.pdf [file microorganisms-08-00916-s001.pdf]

## Supplementary figure 1

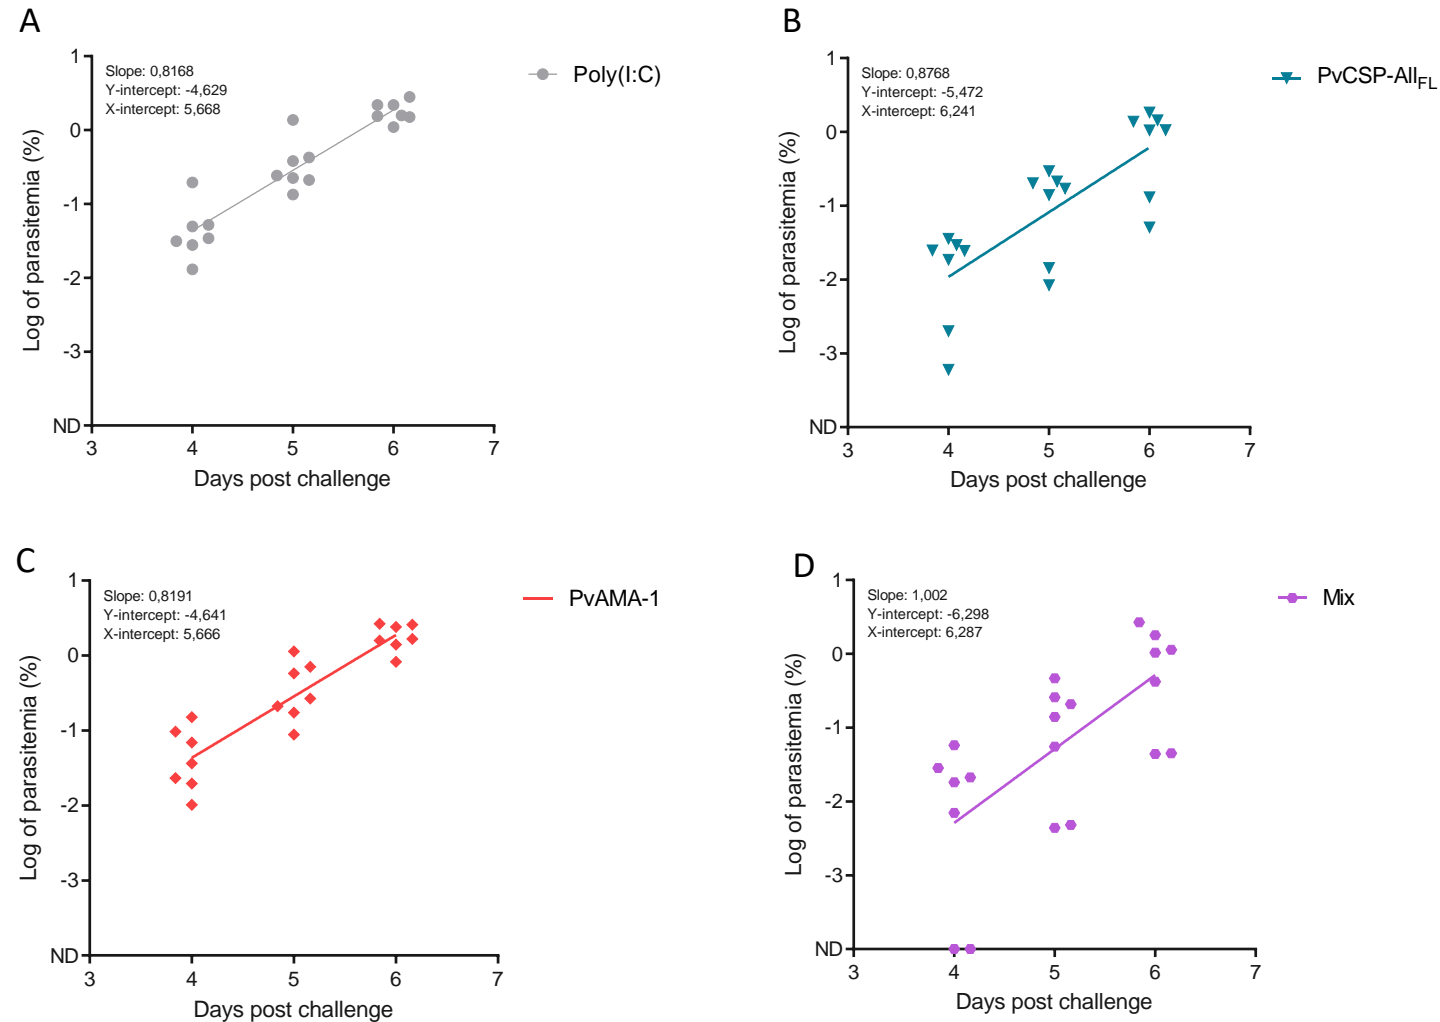

**Supplementary Figure 1. Evaluation of parasitemia after challenge in immunized mice.** Groups of seven 6- to 8-week-old female C57BL/6 mice were immunized (s.c.) with Poly(I:C) (50 µg/dose) (A), plus 10 µg of PvCSP-All<sub>FL</sub> (B), 10 µg of PvAMA-1 (C) or the Mix of 10 µg of each recombinant protein (D). On day 58 after priming, the mice were challenged with 5,000 Pb/PvCSP-VK210 transgenic sporozoites as described in materials and methods. Parasitemia was analyzed by flow cytometry. The percentage of infected red blood cells (iRBCs) on days four, five, and six post-infection (p.i.) was expressed as log values for normalization before statistical analysis. The log of parasitemia post-challenge was measured on each immunized group and slopes and intercepts used to calculate p-values are indicated in the graphs.
